# Supplementary material for: Enhanced visible photocatalytic activity of a BiVO4@β-AgVO3 composite synthesized by an in situ growth method
Source: Royal Society of Chemistry journal article supplement (doi:10.1039/c4ra02110j), 2014-01-01
Supplement: c4ra02110j1.pdf [file c4ra02110j1.pdf]

# Enhanced visible photocatalytic activity of $\text{BiVO}_4@ \beta\text{-AgVO}_3$ composite synthesized by an in-situ growth method

Yanmei Yang,<sup>a</sup> Yuanyuan Liu,<sup>\*a</sup> Baibiao Huang,<sup>\*a</sup> Rui Zhang,<sup>b</sup> Ying Dai,<sup>b</sup> Xiaoyan Qin<sup>a</sup> and Xiaoyang Zhang<sup>a</sup>

<sup>a</sup> State key lab of crystal materials, Shandong university, Jinan, China, 250100.

Email: bbhuang@sdu.edu.cn (Baibiao Huang), yyliu@sdu.edu.cn (Yuanyuan Liu)

<sup>b</sup> School of physics, Shandong university, Jinan, China, 250100.

## Experimental section

### Materials

$\text{AgNO}_3$ ,  $\text{NH}_4\text{VO}_3$ ,  $\text{Bi}(\text{NO}_3)_3 \cdot 5\text{H}_2\text{O}$  and  $\text{NH}_3 \cdot \text{H}_2\text{O}$  (25-28%) were analytical reagent grade and used as received without further purification.

### Synthesis of $\beta\text{-AgVO}_3$ nanowires, $\text{BiVO}_4@ \beta\text{-AgVO}_3$ composites and $\text{BiVO}_4$

#### 1. Synthesis of $\beta\text{-AgVO}_3$ nanowires

1mmol  $\text{NH}_4\text{VO}_3$  was dissolved in 60 mL deionized water under stirring to obtain a transparent solution. Then, 1mmol  $\text{AgNO}_3$  was added into the above solution and stirred for 2min. The pH value of the solution was adjusted to 8-8.2 by using  $\text{NH}_3 \cdot \text{H}_2\text{O}$  (25-28%) and the mixture was transferred into a 100 mL Teflon-lined stainless vessel and heated at 180 °C for 12h. The brown  $\beta\text{-AgVO}_3$  nanowires were washed several times with deionized water and ethanol, dried in an oven at 60°C for 6h.

#### 2. Synthesis of $\text{BiVO}_4@ \beta\text{-AgVO}_3$ composites

0.2g as-prepared  $\beta\text{-AgVO}_3$  nanowires were dispersed in 75 mL deionized water. Then, a certain amount of  $\text{Bi}(\text{NO}_3)_3 \cdot 5\text{H}_2\text{O}$  was added under stirring and ultrasonication to obtain a uniform mixture which was transferred into a 100 mL Teflon-lined stainless vessel and heated at 160 °C for 12h. The final samples were washed several times with deionized water and ethanol, and dried in an oven at 60 °C for 6h.  $\text{BiVO}_4@ \beta\text{-AgVO}_3$  composites with different molar amounts of  $\text{BiVO}_4$  were obtained: 5%, 10%, 15%, 20%, and the samples prepared were denoted as  $\text{BiVO}_4@ \beta\text{-AgVO}_3\text{-5\%}$ ,  $\text{BiVO}_4@ \beta\text{-AgVO}_3\text{-10\%}$ ,  $\text{BiVO}_4@ \beta\text{-AgVO}_3\text{-15\%}$ ,  $\text{BiVO}_4@ \beta\text{-AgVO}_3\text{-20\%}$ , respectively.

#### 3. Synthesis of $\text{BiVO}_4$

For comparison,  $\text{BiVO}_4$  was prepared using equimolar  $\text{NH}_4\text{VO}_3$  and  $\text{Bi}(\text{NO}_3)_3 \cdot 5\text{H}_2\text{O}$  through the above process, and the other conditions are the same as that in 2.

### Characterization

XRD patterns of the as-prepared samples were recorded on an X-ray diffractometer (XRD Bruker D8-advanced X-ray powder diffractometer with Cu-K $\alpha$  radiation  $\lambda=1.5418 \text{ \AA}$ ). The morphology and microstructure were determined by scanning electron microscopy (SEM Hitachi S-4800 microscope) and high-resolution transmission electron microscopy (HR-TEM JEOL JEM-2100 instrument). The diffuse reflectance spectra (DRS) were measured using a UV/visible

spectrophotometer (UV-2550, Shimadzu). The Brunauer–Emmett–Teller (BET) surface areas were measured with a Micromeritics ASAP 2020 apparatus at liquid nitrogen temperature. The TOC (total organic carbon) before and after photocatalysis by  $\text{BiVO}_4@\beta\text{-AgVO}_3$ -15% was evaluated by TOC-V CPH (Shimadzu).

### Photocatalytic evaluation

Photocatalytic activities of  $\beta\text{-AgVO}_3$ ,  $\text{BiVO}_4$  and  $\text{BiVO}_4@\beta\text{-AgVO}_3$  composites were evaluated by the degradation of rhodamine B (RhB) under visible light irradiation of a 300 W Xe arc lamp (PLS-SXE300, Beijing Trusttech Co. Ltd.) with UV cutoff filter (providing visible light with  $\lambda > 420$  nm). Typically, RhB is a potentially toxic and carcinogenic pollutant and extensively used to characterize the photocatalytic activities of materials in photocatalysis research. In a typical process, 0.1g of as-prepared samples were added to 100 mL RhB solution ( $10\text{mg}\cdot\text{L}^{-1}$ ). After being dispersed in an ultrasonic bath, the mixture was kept under stirring for 1 h in the dark to reach adsorption equilibrium and exposed to the visible light irradiation. 5 mL solution was taken out from the reaction beaker at given time intervals and centrifuged to remove the suspension. Then the RhB degradation concentration was measured by a Shimadzu UV2550 recording spectrophotometer.

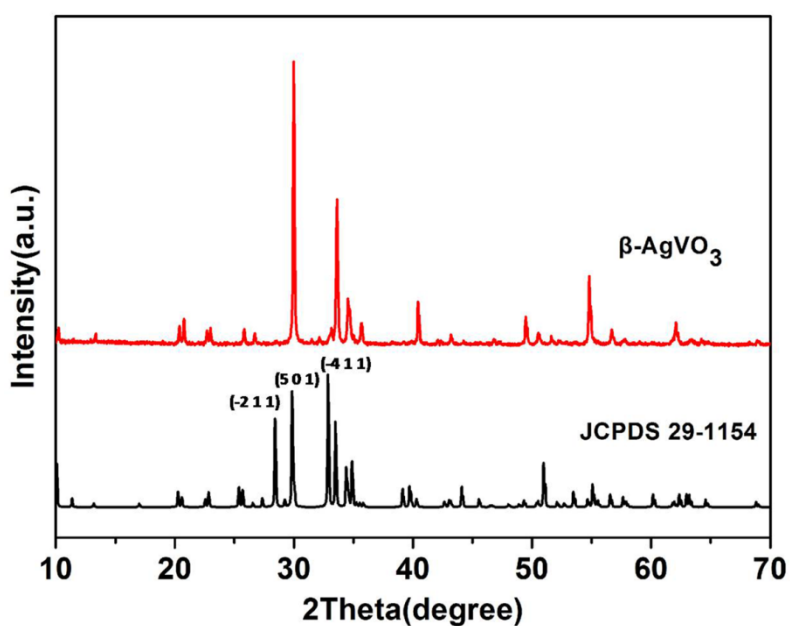

Fig. S1 XRD patterns of as-prepared  $\beta\text{-AgVO}_3$

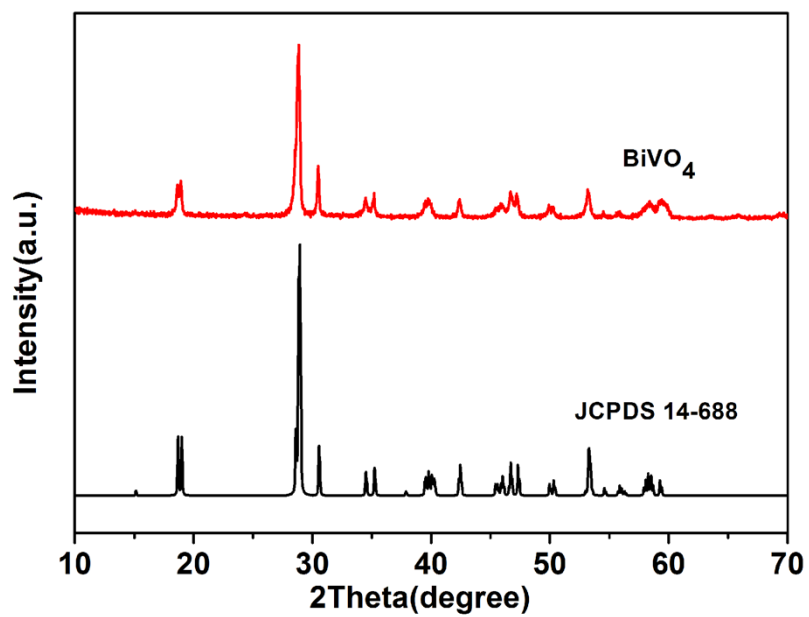

Fig. S2 XRD patterns of as-prepared  $\text{BiVO}_4$

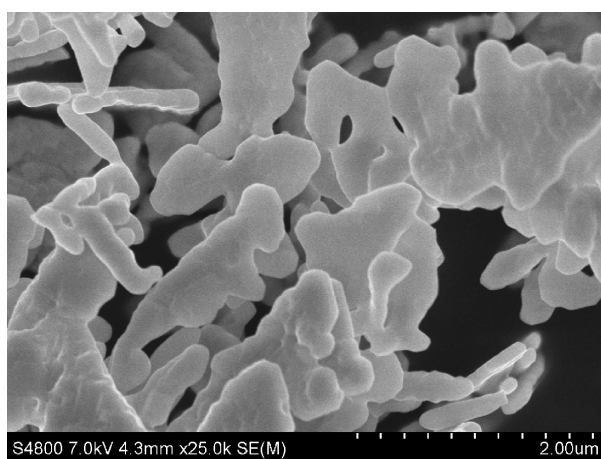

Fig. S3 SEM image of  $\text{BiVO}_4$
